# Supplementary material
Source: PubMed Central journal article supplement (PMC3975677)
Supplement: NIHMS562563-supplement-3.pdf [file NIHMS562563-supplement-3.pdf]

# Integrative analysis of 1q23.3 copy number gain in metastatic urothelial carcinoma - Supplemental Information - Chromosomal Instability

August 15, 2013

## 1 Fraction Genome Altered

Hurst et al. [1] defined with “Fraction Genome Altered” (FGA) a measure of chromosomal instability of samples. Specifically, the authors defined FGA as the fraction of clones either gained or lost. By analyzing all segments in both cohorts, we found a percentage of FGA of approximately 24%, slightly lower than the 29% Hurst et al. found for invasive UC ( $pT \geq 2$ ). The boxplot in Supplemental Figure S6 shows the distributions of FGA for all loci in the Spanish and DFCI cohorts. FGA was not associated with OS after recurrence/start of treatment (Spanish cohort:  $P = 0.31$ ; DFCI cohort:  $P = 0.72$ ), initial pathologic stage ( $pT \geq 2$ ; Spanish cohort:  $P = 0.68$ ; DFCI cohort:  $P = 0.36$ ) or type of tissue (primary vs. metastasis in the DFCI cohort;  $P = 0.71$ ).

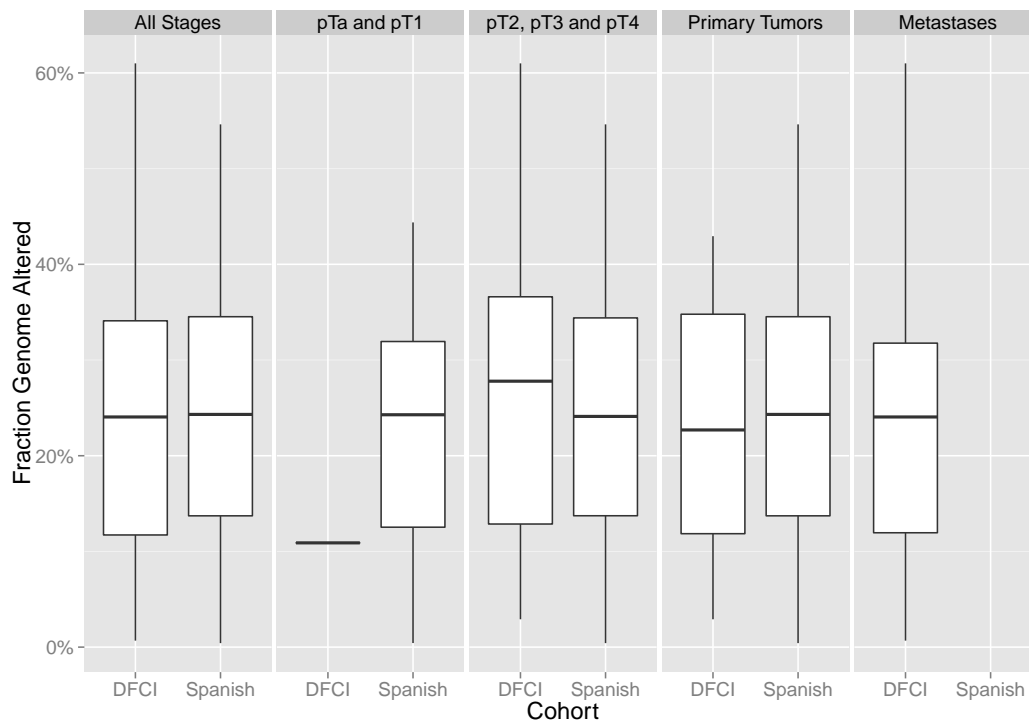

Figure S6: Fraction of genome altered (FGA, [1]) in both cohorts. For the DFCI cohort, only one sample was non-invasive ( $pT < 2$ ) at time of surgery.

## References

- [1] C D Hurst, F M Platt, C F Taylor, and M A Knowles. Novel tumor subgroups of urothelial carcinoma of the bladder defined by integrated genomic analysis. *Clin Cancer Res*, 18(21):5865–5877, Nov 2012.
